# Supplementary material
Source: publisher site journal article supplement (http://content.karger.com/ProdukteDB/miscArchiv/000/248/649/000248649_sm_Suppl._Material.pdf)
Supplement: Supplementary file 1 [file 000248649_sm_Suppl._Material.pdf]

## Online Supplementary Material

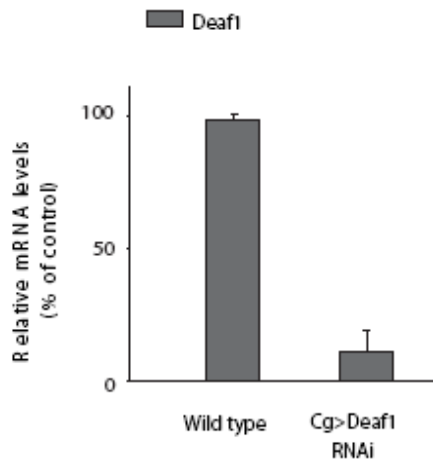

**Online Supplementary Fig. 1.** Analysis of UAS-Deaf1 RNAi efficiency. Adult fat bodies of 5 day old flies expressing the Deaf1 RNAi construct (Cg>Deaf1 RNAi) were dissected to assess Deaf1 mRNA levels. *Deaf1* mRNA levels in wild-types were set to 100%. Error bars indicate two technical replicates. Experiment was independently reproduced twice.



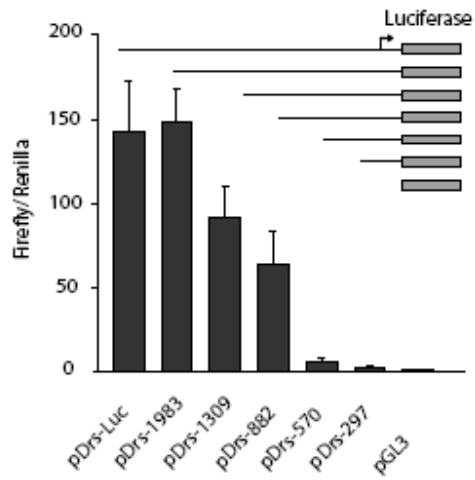

**Online Supplementary Fig. 3.** Identification of a minimal *Drs* enhancer sequence. Enhancer elements of the *Drs* promoter ranging from +50 to -1983, -1309, -882, -570 and -297 were cloned upstream of a luciferase gene in the pGL3 vector (Promega). All reporter constructs were transiently transfected with Toll<sup>ALLR</sup> and *Renilla* coreporter to test for Luciferase expression. Experiment was independently reproduced twice. Error bars account for the standard deviation of quadruplicates.

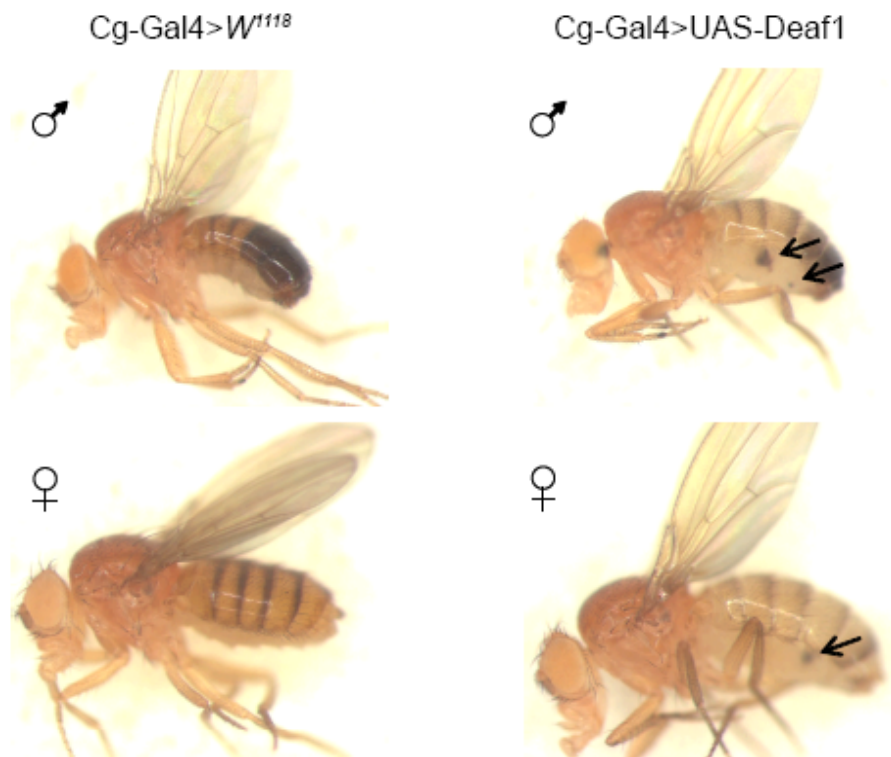

**Online Supplementary Fig. 4.** Overexpression of Deaf1 in adult fatbody and hemocytes induces melanotic tumors. Flies carrying UAS-Deaf1 construct (7), were crossed with the Cg-Gal4 driver and kept at 29°C. Arrows indicate melanotic tumors. <sup>w<sup>1118</sup></sup> flies crossed with Cg-Gal4 individuals served as the negative control.

## Supplemental Methods

### Large scale RNAi screening

Hemocyte derived *Drosophila* SL2 cells were maintained in Schneider's medium (Invitrogen) supplemented with 10% fetal calf serum (PAA) and penicillin-streptomycin (Invitrogen). Cells were grown at 25°C at sub-confluent densities. All screening experiments were performed in 96-well tissue culture plates (Microtest Tissue Culture Plate 96 well Flat Bottom, Falcon). Screening plates were pre-loaded with an average of 1µg dsRNA per well in 10µl of 1mM Tris pH7 with a Biomek FX robot (Beckmann-Coulter). To transfect *EGFR-Toll*, *Drs-luc* and *pIz-RL* reporter constructs, 5 million SL2 cells were seeded per 35mm dish (Cellstar, Greiner) and cultured for 24h. Then 0.7µg of h*EGFR-Toll* (1), 0.7 µg *Drs-luc* plasmid DNA (2) and 0.7µg *pIz-Rluc* (*pIZ-RL*, Renilla luciferase expression plasmid, Invitrogen) were co-transfected using Effectene (Qiagen) according to manufacturer's instructions. Sixteen hours after transfection, cells were resuspended in serum free medium, adjusted to 10,000 cells per µl and 50µl were subsequently seeded per well of the 96-well tissue culture plates containing the dsRNA using a liquid dispensing unit (Multidrop, Thermo Labsystems). After 45 minutes of starvation, 50µl of complete medium was added to each well. Cells were incubated in sealed assay plates at 25°C. Ninety-six hours after RNAi treatment, cells were stimulated by adding recombinant human EGF (Biomol) to a final concentration of 0.2ng/µl. Sixteen hours after induction, cells were lysed and the lysate was split to read Firefly and *Renilla* luciferase activities in separate assay plates (white 96-well LIA Plates, Greiner) using a Mithras LB940 plate reader (Berthold Technologies). The screen was performed in duplicate.

### Computational analysis

To identify candidate genes that significantly increase or decrease Toll pathway activity, the ratio of Firefly and *Renilla* raw luciferase results were normalized by median centering of each 96well plate. z-scores were calculated as the number of median-adjusted standard deviation (mad) that a particular well differed from the median of the 96well plate. All calculations were performed on the R-biostatistical platform using cellHTS package (3). To minimize false negatives, we applied a set of low-stringency criteria to generate a list of candidate genes. First, we filtered dsRNA treatments with z-scores > 2.5 for negative regulators or <-2.5 for positive regulators, respectively. Treatments that showed a high variability between duplicates were excluded (standard deviation higher than 50% of the replicates average). We also filtered against previously identified cell viability modifiers that show a phenotype in cultured *Drosophila* cells (4). We further excluded genes that showed phenotypes in other screens ( M.B., unpublished observations). These filtering steps led to a final list of approximately 32 candidates (Supplementary table 1).

### Cloning of Deaf1 full length and deletion constructs

cDNA from reverse transcribed total RNA served as template to amplify Deaf1 in a PCR reaction using AccuPrime™ Taq DNA Polymerase High Fidelity (Invitrogen) following manufacturer's instructions. Fragments generated by combinations of forward primers EcoRI-CTATCGTTGGACCGCAGAATAAGTG, EcoRI-CTAGTATGCGTCTGCTGCGACG-ACGAAGC and reverse primers XbaI- GGAATGATCGTCGATCAACAGC, XbaI-GTCCGCGTGCACCTTGACAC were subcloned into EcoRI and XbaI sites of pAc5.1V5/His expression vector (Invitrogen).

### ***Drosomycin* promoter luciferase reporters**

All *Drs* promoter sequences were subcloned into NheI/NcoI sites of pGL3-basic luciferase reporter plasmid (Promega). To generate *Drs* reporters of different length we combined 3' primer NcoI-TGGAAAAGGTTCTCACGGAG with 5' primer NheI-GTTTCAGCGGAGAGTTCCAG (pDrs-1983), NheI-GGCAATCTTAGCAACAACGA (pDrs-1309), NheI-CGGTCGTTTCGAATTTTGTT (pDrs-882), NheI-CCGTGCATTC-TTAAAGCAA (pDrs-570) and NheI-CGAATCATTTTTGCTGGACA (pDrs-297).

### **Site directed mutagenesis**

To introduce mutations in TTCG sites of the construct pDrs-882 we used the QuickChange® II Site-Directed Mutagenesis kit (Stratagene) according to manufacturer's instructions. Site location, mutated sequence and primers are given in Supplementary table 3.

### **Cloning of a *Deaf1* *in-vivo* hairpin RNAi construct**

XbaI-GCCCTGTCCGTCTCTTACA and XbaI-TCCTTTTGC-AGAACCTCGAT primers were used to amplify a 517bp long fragment of exon three of *Deaf1* for *in vivo* RNAi. The PCR generated amplicon was subcloned into NheI and SpeI sites of the pWiz plasmid (5) to generate an inverted repeat separated by the white intron 2. The resulting plasmid, pWiz-*Deaf1*-RNAi, was first tested in cell culture for RNAi efficiency and then injected into *w*<sup>1118</sup> embryos to generate transgenic flies.

Supplementary Table 1 Screening results

| GeneID     | CG      | z-score <sup>a</sup> | dsRNA ID | Primer 1                | Primer 2                 | Specificity / Efficiency / % <sup>b</sup> |
|------------|---------|----------------------|----------|-------------------------|--------------------------|-------------------------------------------|
| Rel        | CG11992 | -11.19               | HFA16819 | CAGAGCGCTCGTACAAA       | TCCTGTTTAAATTTCGAATAA    | 100 20                                    |
| Myd88      | CG2078  | -10.15               | HFA06815 | ACTCGTGGCCCATCTCC       | CTGGATATCGTGGCAGAC       | 100 5                                     |
| Trf2       | CG18009 | -9.86                | HFA18727 | CTAGCGTAAACCAAGTTGA     | GTAACGTGGACGCTATTCT      | 100 23                                    |
| plf        | CG5974  | -8.22                | HFA17026 | GGCGTCAAGAACTCAA        | CGAGGCTGATCTAAAC         | 100 12                                    |
| tkk        | CG1856  | -7.68                | HFA17091 | ACAGCGATGGCGAAGGT       | GACCCAGCAGCCTTGAAC       | 100 17                                    |
| Deaf1      | CG8567  | -6.16                | HFA11143 | GATGTCATCCAGCAACAG      | TGACTACCTGCTGCTC         | 100 9                                     |
| TRIA-L     | CG5930  | -5.95                | HFA16882 | ATGCCAAGGCCAAGAAAG      | ACAGGCATATGGATTGG        | 100 9                                     |
| TRIA-S     | CG5163  | -5.46                | HFA16883 | TGAACTGTACCGCAACCC      | AGAACTCGCGCTCTTG         | 79 15                                     |
| M-2        | CG8103  | -5.33                | HFA11222 | CGGAGGCGAAGATGG         | ACCCATTGGGAATGCCAG       | 100 7                                     |
| bon        | CG5206  | -5.28                | HFA16914 | AGGTGCTGGTGGAAAAGAA     | ACCGTCAACCCGAAAG         | 100 13                                    |
| Eip93F     | CG18389 | -5.07                | HFA16661 | GGCATAATGAACGAGGGAC     | CATCATCTCTGTATGCTAGAC    | 102 8                                     |
| kay        | CG15509 | -4.99                | HFA16977 | CGGAAATACCTGAAATAAG     | GCGCCGGCTTGAGA           | 100 7                                     |
| CG1244     | CG1244  | -4.27                | HFA08274 | CAATTGAGACCAAGTATGG     | GCGCATGATGGCCATT         | 100 13                                    |
| Su(Hw)2-10 | CG8068  | -4.23                | HFA07721 | CATGCGATTTCCGCTCTT      | GTAAGAAAGGCACCTCTTGG     | 100 12                                    |
| Taf4       | CG5444  | -4.03                | HFA11297 | ATTGTGCAATACGTGGACC     | GGCTGGGTTCTTTT           | 100 10                                    |
| CG32180    | CG32180 | -3.96                | HFA11160 | CGAGTCAAAGTCTCTATAAT    | TTGATCAAGCTCTCTGTAG      | 100 4                                     |
| hay        | CG8019  | -3.2                 | HFA11354 | TACCAACAATCCAGACATTAAT  | ATCCAGCTTCAATGAGA        | 100 18                                    |
| Fer1       | CG33323 | -3.04                | HFA12555 | CTGTACCGCAAGGGTGA       | ACTGCCGCTGTGAAAA         | 100 11                                    |
| CG3711     | CG3711  | -3.01                | HFA18647 | TCTTCGAGGCGCTAC         | CCCAACCCGTAAGCCTTC       | 100 15                                    |
| gce        | CG6211  | 3.11                 | HFA19974 | CAATAGTTCATATGGCGAGTC   | GTTTTGGGTTACCATGCC       | 100 12                                    |
| CG30426    | CG30426 | 3.14                 | HFA04119 | CGGTACACCAAGGAGATGG     | CAAAATTGCTACGTCAACAC     | 100 13                                    |
| CG31441    | CG31441 | 3.14                 | HFA15723 | TGCGAAAAAGCGGATAGT      | GCTACAGAACCGCAAGC        | 100 19                                    |
| CG7015     | CG7015  | 3.19                 | HFA10761 | AGTGGCGATCCGACC         | CITCAGTAAAGTGGAAAAATAAAC | 91 14                                     |
| stw        | CG3836  | 3.32                 | HFA11400 | TTCGAGCGACCGATG AAG     | AATATCGGAGAAAGGATCTG     | 100 21                                    |
| pb         | CG31481 | 3.33                 | HFA12629 | ATCAAAAAGGAGCGGCT       | GTTGGTCTGTTGTAGTGT       | 100 14                                    |
| CG33936    | CG33188 | 3.56                 | HFA15147 | CGCTTAGAAAAAGCAACAG     | ACTCTCTGCAAAACATCTCC     | 80 14                                     |
| BhbVII     | CG11494 | 3.73                 | HFA08151 | TGCAATGGACAGTTGTTGATT   | GCCGCTCAGGGGCT           | 100 7                                     |
| CG33213    | CG33213 | 4.07                 | HFA14487 | CGCAACCGGCAAAAGGT       | CCACTTGTTCTCCAGCG        | 100 9                                     |
| CG32767    | CG32767 | 4.14                 | HFA18386 | CAGCAACATCATCTGCTAAC    | TGTAGACAGGTGGTCTTG       | 100 10                                    |
| Bk         | CG6500  | 4.2                  | HFA19350 | TGATGACTATGGACATACCCAAA | GCTTGCAGAGCATCAGGT       | 100 9                                     |
| osa        | CG7467  | 4.21                 | HFA17022 | CGGTGGTGGGATGGTAG       | CATTGAAAAGCGTGTCT        | 100 5                                     |
| CG3726     | CG3726  | 4.35                 | HFA18320 | CCAGATGCGCCCAATC        | CGTCTCGATCTCTCCAC        | 100 7                                     |
| dalaio     | CG7055  | 4.83                 | HFA18419 | CCTCCAGGAGGACTAAA       | CTCGACTAGCGTTGACTG       | 100 5                                     |
| brm        | CG5942  | 4.87                 | HFA11330 | GTTTGGCTGTACAATAACAATC  | ATGTTGGAGCAGGACTTAAAG    | 100 28                                    |

<sup>a</sup> negative scores correspond to significant impairment of pathway activity. Positive scores correspond with hyperactivation. Calculation of Z-scores were performed using BioConductor package cellHTS (Boutros et al., 2006)

<sup>b</sup> percentage of all possible 21 nucleotide long siRNA originating from dsRNA sequence which match completely to target gene sequence. (Arizman et al., 2005)

<sup>c</sup> percentage of matching siRNAs which are efficient according to Reynolds criteria (Reynolds et al., 2004; Arizman et al., 2005).

Supplementary Table 2 dsRNA template and qPCR primers

| Gene                                      | Primer 1                                       | Primer 2                                     | Probe library # <sup>a</sup> |
|-------------------------------------------|------------------------------------------------|----------------------------------------------|------------------------------|
| T7 tagged primer for RNAi probe synthesis |                                                |                                              |                              |
| GFP                                       | TAAATACGACTACTATAGGACCCCTGTGACCAACCCTGACCTAC   | TAATACGACTCACTATAGGGGACCAATGTGATCGCGCTTCTCGT |                              |
| Myd88                                     | TAATACGACTCACTATAGGGAACAACATCA.CAGTGGCCAAAAGTG | TAATACGACTCACTATAGGGGAGTAGATCGAAAAGGCATCCAGA |                              |
| Cactus                                    | TAATACGACTCACTATAGGGAA.GGCAACAAGCAACAAGTGA     | TAATACGACTCACTATAGGGCCTGA.TCCTCTTCTTCGTCCG   |                              |
| Dif                                       | TAATACGACTCACTATAGGGCCCAAAATTGGACCAC           | TAATACGACTCACTATAGGGTGGCACTCATTTTCTGACTTA    |                              |
| Dorsal                                    | TAATACGACTCACTATAGGACTACA.ATCGTTTGCCAG         | TAATACGACTCACTATAGGGTGATTTGTGGTCAGGTTCCA     |                              |
| IMD                                       | TAATACGACTCACTATAGGAGA.ATGTCAAAGCTCAGGAACCT    | TAATACGACTCACTATAGGGAGAAATGCTGACCCGTTTTGCGCG |                              |
| Relish                                    | TAATACGACTCACTATAGGTGGACACATGGATCGCTAA         | TAATACGACTCACTATAGGCGGACTTGGGTTATTGATT       |                              |
| Deaf1 1                                   | TAATACGACTCACTATAGGTGATGAGGAAGAAGAGGAGGA       | TAATACGACTCACTATAGGGTTCACATTATCTGCGGTCCA     |                              |
| Deaf1 2                                   | TAATACGACTCACTATAGGGATCGTCA.TCCAGCAACAG        | TAATACGACTCACTATAGGGTGACTCACCTGCTTCGTC       |                              |
| Deaf1 3                                   | TAATA.CGACTCACTATAGGGCCCTGTCGTCCTTTTACA        | TAATACGACTCACTATA.GGGGCCATCGTTGATGTTCA.CCAC  |                              |
| Deaf1 4                                   | TAATACGACTCACTATAGGGCTAAAAGT.CCTTGCAGTTCGGTT   | TAATACGACTCACTATAGGGGCTTGCCTCAGTTC.AATA      |                              |
| qPCR primer sequence                      |                                                |                                              |                              |
| RP49                                      | CGGATCGATATGCTAAGCTGT                          | GCGCTTGTTCGATCCGTA                           | 105                          |
| Drosomylin                                | TACTTGTTGCCCCCTCTTCG                           | GTATCTTCCGGACAGGCAGT                         | 131                          |
| Diptericin                                | CCGAGTACCACCTCAATCT                            | ACTGCAAAGCCAAAACCATC                         | 70                           |
| Deaf1                                     | CCGAGGATGTTGTGAAAGAAG                          | ATGCGAACCTTGGTGTCC                           | 19                           |
|                                           |                                                |                                              | 84                           |

<sup>a</sup> Primers for qPCR analysis were generated using the online tool at [www.universalprobelibrary.com](http://www.universalprobelibrary.com)

Supplementary Table 3 Primers used to introduce point mutations.

| Name     | site location <sup>a</sup> | Wild Type sequence | mutated sequence | Primer 1                                                                                   | Primer 2           |
|----------|----------------------------|--------------------|------------------|--------------------------------------------------------------------------------------------|--------------------|
| Drs-mutA | -23                        | CGAA               | AGAG             | GTGCACTATAAAGCTTCTCCTAGAGGTTCCCAAGCGACTTGTGGCTTGGGAACCTCTAGGAGAAGCTTCCACAAGTCCGATATAGTGCAC | ATATAGTGCAC        |
| Drs-mutB | -88                        | TTCG               | A GAG            | GTATCATCATAAATTTTGTGATATACAGAGTTTATA GCCGATGGGTAGTCGGGTATAAACTCTGTATATCACCCGACTACGCATCGGC  | ACAAAATTATGATGATAC |
| Drs-mutC | -140                       | CGAA               | AGAG             | CAAAGTAGTTCCCTACAGAGGGCCTATAAATGTG CATGTCCAGTCCACATTTATAGGCCCTCTGTAGGGGACTGCACATG          | AACTACTTTCG        |
| Drs-mutD | -169                       | TTCG               | AGAG             | GCAATGCTTTTTCGCTTAGAGATAAGCGTAAAGAACTACTTGTACCGCTTATCTCTAAAGCGTAAAGCCAAAGTAGTTCC           | AAAAGCATTTGC       |
| Drs-mutE | -182                       | TTCG               | AGAG             | CAAATGAGGCTCTAAGCAATGCTTAGAGCTTACG CGCTTATCGAAAAGCGTAAAGCTTAAAGCAATTGCTTCTTTTCGATAAGCG     | AGAGCCCTCATTTG     |

<sup>a</sup> location of TTCG motif relative to transcriptional start site of *Drosomycin*

### Supplementary References

1. Sun, H., P. Towb, D. N. Chiem, B. A. Foster, and S. A. Wasserman. 2004. Regulated assembly of the Toll signaling complex drives *Drosophila* dorsoventral patterning. *Embo J* 23:100-110.
2. Tauszig-Delamasure, S., H. Bilak, M. Capovilla, J. A. Hoffmann, and J. L. Imler. 2002. *Drosophila* MyD88 is required for the response to fungal and Gram-positive bacterial infections. *Nat Immunol* 3:91-97.
3. Boutros, M., L. P. Bras, and W. Huber. 2006. Analysis of cell-based RNAi screens. *Genome Biol* 7:R66.
4. Boutros, M., A. A. Kiger, S. Armknecht, K. Kerr, M. Hild, B. Koch, S. A. Haas, R. Paro, and N. Perrimon. 2004. Genome-wide RNAi analysis of growth and viability in *Drosophila* cells. *Science* 303:832-835.
5. Lee, Y. S., and R. W. Carthew. 2003. Making a better RNAi vector for *Drosophila*: use of intron spacers. *Methods* 30:322-329.
7. Veraksa, A., J. Kennison, and W. McGinnis. 2002. DEAF-1 function is essential for the early embryonic development of *Drosophila*. *Genesis* 33:67-76.
